# Supplementary material for: A pleiotropic variant in DNAJB4 is associated with multiple myeloma risk
Source: PubMed Central journal article supplement — Int J Cancer. 2022 Oct 1;152(2):239–48. doi: 10.1002/ijc.34278 (PMC9828677; doi:10.1002/ijc.34278), 2022-10-01

# A pleiotropic variant in *DNAJB4* is associated with multiple myeloma risk

**Writing team:** Marco Dicario <sup>1#</sup>, Matteo Giaccherini <sup>1#</sup>, Alyssa Clay-Gilmour <sup>2#</sup>, Angelica Macaudo <sup>3</sup>, Juan Sainz <sup>4,5,6</sup>, Mitchell J. Machiela <sup>7</sup>, Malwina Rybicka-Ramos <sup>8</sup>, Aaron D. Norman <sup>9,10</sup>, Agata Tyczyńska <sup>11</sup>, Stephen J. Chanock <sup>7</sup>, Torben Barington <sup>12</sup>, Shaji K. Kumar <sup>13</sup>, Parveen Bhatti <sup>14,15</sup>, Wendy Cozen <sup>16</sup>, Elizabeth E. Brown <sup>17</sup>, Anna Suska <sup>18</sup>, Eva Kannik <sup>12</sup>, Robert Z. Orlowski <sup>19</sup>, Marek Dudziński <sup>20</sup>, Ramon Garcia-Sanz <sup>21</sup>, Marcin Kruszewski <sup>22</sup>, Joaquin Martinez-Lopez <sup>23</sup>, Katia Bieder <sup>24</sup>, Elżbieta Iskierka-Jazdzewska <sup>25</sup>, Matteo Pelosini <sup>26</sup>, Sonja I. Berndt <sup>7</sup>, Małgorzata Rażny <sup>27</sup>, Krzysztof Jamroziak <sup>28</sup>, S. Vincent Rajkumar <sup>13</sup>, Artur Jurczyszyn <sup>18</sup>, Annette Juul Vangsted <sup>12</sup>, Pilar Garrido Collado <sup>5</sup>, Ulla Vogel <sup>29</sup>, Jonathan N. Hofmann <sup>7</sup>, Mario Petrini <sup>30</sup>, Aleksandra Butrym <sup>31</sup>, Susan L. Slager <sup>9</sup>, Elad Ziv <sup>32</sup>, Edyta Subocz <sup>33</sup>, Graham G. Giles <sup>34,35,36</sup>, Niels Frost Andersen <sup>12</sup>, Grzegorz Mazur <sup>37</sup>, Marzena Watek <sup>38,39</sup>, Fabienne Lesueur <sup>40</sup>, Michelle A. T. Hildebrandt <sup>19</sup>, Daria Zawirska <sup>41</sup>, Lene Hyldahl Ebbesen <sup>12</sup>, Herlander Marques <sup>42</sup>, Federica Gemignani <sup>1</sup>, Charles Dumontet <sup>43</sup>, Judit Várkonyi <sup>44</sup>, Gabriele Buda <sup>30</sup>, Arnon Nagler <sup>24</sup>, Agnieszka Druzd-Sitek <sup>45</sup>, Xifeng Wu <sup>46</sup>, Katalin Kadar <sup>44</sup>, Nicola J. Camp <sup>47</sup>, Norbert Grzasko <sup>48</sup>, Rosalie Waller <sup>10</sup>, Celine Vachon <sup>9\*</sup>, Federico Canzian <sup>3\*</sup>, Daniele Campa <sup>1\*</sup>

**Supplementary table 1.** SNPs associated with MM risk in InterLymph ( $P < 10^{-4}$ )

**Supplementary table 2:** Minor allelic frequency (MAF) of the ten SNPs analyzed in the replication phase.

**Supplementary table 3:** effect sizes and  $P_{\text{values}}$  reported in GWAS catalog for the SNPs selected for replication.

**Supplementary figure 1.** Flowchart of the process performed to select the SNPs to be replicated in IMMENSE and FinnGen

**Supplementary table 1. SNPs associated with MM risk in InterLymph (P<10<sup>-4</sup>)**

| SNP                     | Locus  | Position       | Gene   | M/m <sup>b</sup> | OR (95%CI)       | Pvalue                | SNP                     | Locus    | Position       | Gene       | M/m <sup>b</sup> | OR (OR 95%CI)    | Pvalue                |
|-------------------------|--------|----------------|--------|------------------|------------------|-----------------------|-------------------------|----------|----------------|------------|------------------|------------------|-----------------------|
| rs34517439              | 1p31.1 | chr1:78450517  | DNAJB4 | C/A              | 1.30 (1.15-1.48) | 4.70x10 <sup>-5</sup> | rs1022206               | 3q13.13  | chr3:110585338 | -          | T/C              | 1.18 (1.09-1.28) | 8.61x10 <sup>-5</sup> |
| rs17391694              | 1p31.1 | chr1:78623626  | -      | C/T              | 1.31 (1.16-1.48) | 1.23x10 <sup>-5</sup> | rs11135441              | 5q15     | chr5:95222277  | ELL2       | C/T              | 0.83 (0.76-0.90) | 2.34x10 <sup>-5</sup> |
| rs2279948               | 1p22.3 | chr1:86691285  | -      | G/A              | 1.33 (1.15-1.54) | 9.94x10 <sup>-5</sup> | rs3777200               | 5q15     | chr5:95234791  | ELL2       | C/T              | 0.82 (0.74-0.90) | 1.73x10 <sup>-5</sup> |
| rs6674512               | 1p22.3 | chr1:86714253  | -      | G/A              | 1.40 (1.21-1.62) | 8.71x10 <sup>-6</sup> | rs56219066 <sup>a</sup> | 5q15     | chr5:95242931  | ELL2       | T/C              | 0.82 (0.75-0.90) | 2.22x10 <sup>-5</sup> |
| rs17129031              | 1p22.3 | chr1:86736892  | -      | T/C              | 1.37 (1.18-1.59) | 4.18x10 <sup>-5</sup> | rs3777189               | 5q15     | chr5:95253108  | ELL2       | C/G              | 0.82 (0.74-0.90) | 1.69x10 <sup>-5</sup> |
| rs7577599 <sup>a</sup>  | 2p23.3 | chr2:25613146  | DTNB   | T/C              | 0.79 (0.71-0.88) | 2.19x10 <sup>-5</sup> | rs1423269 <sup>a</sup>  | 5q15     | chr5:95255724  | ELL2       | A/G              | 0.82 (0.74-0.90) | 1.70x10 <sup>-5</sup> |
| rs3769943               | 2q24.3 | chr2:166186004 | SCN2A  | G/C              | 0.84 (0.77-0.92) | 6.62x10 <sup>-5</sup> | rs3777184               | 5q15     | chr5:95262044  | ELL2       | G/C              | 0.81 (0.74-0.89) | 1.64x10 <sup>-5</sup> |
| rs10187103              | 2q24.3 | chr2:166188694 | SCN2A  | C/T              | 0.84 (0.77-0.91) | 6.06x10 <sup>-5</sup> | rs4143832               | 5q31.1   | chr5:131862977 | AC116366.3 | G/T              | 0.81 (0.73-0.90) | 4.66x10 <sup>-5</sup> |
| rs7420021               | 2q24.3 | chr2:166188699 | SCN2A  | A/T              | 0.84 (0.77-0.92) | 6.66x10 <sup>-5</sup> | rs537930                | 5q31.1   | chr5:134348703 | -          | G/T              | 0.83 (0.76-0.91) | 5.09x10 <sup>-5</sup> |
| rs7581427               | 2q24.3 | chr2:166238034 | SCN2A  | T/C              | 0.84 (0.78-0.92) | 8.24x10 <sup>-5</sup> | rs1063348               | 6p21.32  | chr6:32627923  | HLA-DQB1   | G/A              | 0.84 (0.77-0.92) | 7.44x10 <sup>-5</sup> |
| rs6763508 <sup>a</sup>  | 3p22.1 | chr3:41750989  | ULK4   | T/C              | 1.24 (1.11-1.37) | 7.17x10 <sup>-5</sup> | rs9372120 <sup>a</sup>  | 6q21     | chr6:106667535 | ATG5       | T/G              | 1.23 (1.11-1.35) | 4.48x10 <sup>-5</sup> |
| rs7651190               | 3p22.1 | chr3:41765955  | ULK4   | A/G              | 1.25 (1.13-1.39) | 2.32x10 <sup>-5</sup> | rs2299864               | 6q21     | chr6:106667994 | ATG5       | C/T              | 1.24 (1.12-1.37) | 1.96x10 <sup>-5</sup> |
| rs6599175 <sup>a</sup>  | 3p22.1 | chr3:41786009  | ULK4   | T/C              | 1.25 (1.12-1.38) | 3.65x10 <sup>-5</sup> | rs3804333               | 6q21     | chr6:106727215 | ATG5       | C/T              | 1.24 (1.12-1.37) | 2.19x10 <sup>-5</sup> |
| rs9832037               | 3p22.1 | chr3:41812032  | ULK4   | T/C              | 1.24 (1.12-1.37) | 6.08x10 <sup>-5</sup> | rs4487645 <sup>a</sup>  | 7p15.3   | chr7:21938240  | DNAH11     | C/A              | 0.84 (0.77-0.91) | 5.15x10 <sup>-5</sup> |
| rs73071352 <sup>a</sup> | 3p22.1 | chr3:41828300  | ULK4   | A/G              | 1.26 (1.12-1.40) | 6.10x10 <sup>-5</sup> | rs1122979               | 7q36.1   | chr7:150915071 | ABCF2      | G/A              | 1.29 (1.14-1.46) | 5.35x10 <sup>-5</sup> |
| rs6768542               | 3p22.1 | chr3:41865474  | ULK4   | G/A              | 1.24 (1.12-1.38) | 4.45x10 <sup>-5</sup> | rs7812088               | 7q36.1   | chr7:150919829 | ABCF2      | G/A              | 1.29 (1.14-1.46) | 5.95x10 <sup>-5</sup> |
| rs114714860             | 3p22.1 | chr3:41882905  | ULK4   | G/C              | 1.26 (1.13-1.40) | 1.56x10 <sup>-5</sup> | rs13252276              | 8p23.1   | chr8:10047203  | -          | C/T              | 0.77 (0.68-0.87) | 3.10x10 <sup>-5</sup> |
| rs6797165               | 3p22.1 | chr3:41887777  | ULK4   | A/G              | 1.26 (1.14-1.40) | 1.33x10 <sup>-5</sup> | rs1948915 <sup>a</sup>  | 8q24.21  | chr8:128222421 | PCAT1      | T/C              | 1.21 (1.11-1.32) | 8.04x10 <sup>-6</sup> |
| rs2683696               | 3p22.1 | chr3:41914898  | ULK4   | T/C              | 1.26 (1.14-1.40) | 1.30x10 <sup>-5</sup> | rs465530                | 12q14.3  | chr12:65330766 | LINC02389  | G/T              | 1.18 (1.09-1.28) | 4.94x10 <sup>-5</sup> |
| rs79211428              | 3p22.1 | chr3:41921810  | ULK4   | C/T              | 1.28 (1.15-1.43) | 1.18x10 <sup>-5</sup> | rs57968458 <sup>a</sup> | 17p11.2  | chr17:16820099 | -          | G/A              | 1.33 (1.18-1.50) | 4.99x10 <sup>-6</sup> |
| rs1052501 <sup>a</sup>  | 3p22.1 | chr3:41925398  | ULK4   | T/C              | 0.79 (0.72-0.88) | 1.53x10 <sup>-5</sup> | rs28507905              | 17p11.2  | chr17:16820513 | -          | C/T              | 1.33 (1.18-1.50) | 1.90x10 <sup>-6</sup> |
| rs1716983               | 3p22.1 | chr3:41964128  | ULK4   | A/G              | 0.80 (0.72-0.89) | 2.72x10 <sup>-5</sup> | rs34562254 <sup>a</sup> | 17p11.2  | chr17:16842991 | TNFRSF13B  | G/A              | 1.42 (1.26-1.61) | 1.88x10 <sup>-8</sup> |
| rs7622665               | 3p22.1 | chr3:41970743  | ULK4   | C/T              | 0.80 (0.72-0.89) | 3.42x10 <sup>-5</sup> | rs4792800               | 17p11.2  | chr17:16845167 | TNFRSF13B  | A/G              | 1.37 (1.22-1.55) | 3.42x10 <sup>-7</sup> |
| rs1717027               | 3p22.1 | chr3:41987920  | ULK4   | C/T              | 0.80 (0.72-0.89) | 2.59x10 <sup>-5</sup> | rs4561508               | 17p11.2  | chr17:16848750 | TNFRSF13B  | C/T              | 1.37 (1.21-1.55) | 6.45x10 <sup>-7</sup> |
| rs7372217               | 3p22.1 | chr3:41990122  | ULK4   | A/G              | 0.80 (0.72-0.89) | 2.79x10 <sup>-5</sup> | rs4273077 <sup>a</sup>  | 17p11.2  | chr17:16849139 | TNFRSF13B  | A/G              | 1.32 (1.17-1.49) | 1.04x10 <sup>-5</sup> |
| rs6599192 <sup>a</sup>  | 3p22.1 | chr3:41992408  | ULK4   | A/G              | 0.80 (0.72-0.89) | 2.51x10 <sup>-5</sup> | rs57166795              | 17p11.2  | chr17:16857177 | TNFRSF13B  | G/A              | 1.37 (1.21-1.55) | 5.27x10 <sup>-7</sup> |
| rs2272007 <sup>a</sup>  | 3p22.1 | chr3:41996136  | ULK4   | C/T              | 0.80 (0.72-0.89) | 2.79x10 <sup>-5</sup> | rs4985726               | 17p11.2  | chr17:16863638 | TNFRSF13B  | C/G              | 1.35 (1.20-1.53) | 1.57x10 <sup>-6</sup> |
| rs9856633               | 3p22.1 | chr3:42013850  | -      | G/A              | 0.80 (0.72-0.89) | 4.31x10 <sup>-5</sup> | rs8132680               | 21q22.12 | chr21:36564709 | RUNX1      | T/C              | 1.21 (1.11-1.33) | 2.96x10 <sup>-5</sup> |

<sup>a</sup> SNPs already known to be associated with the risk of developing MM; b: M= the most common allele in controls; m= the less common allele in controls

**Supplementary table 2:** Minor allelic frequency (MAF) of the ten SNPs analyzed in the replication phase.

| SNP                    | Region   | (Alleles) M/m | MAF Interlymph | MAF IMMEnSE | MAF FinnGen |
|------------------------|----------|---------------|----------------|-------------|-------------|
| rs34517439             | 1p31.1   | C/A           | 0.09           | 0.08        | 0.13        |
| rs6674512              | 1p22.3   | G/A           | 0.06           | 0.06        | 0.07        |
| rs10187103             | 2q24.3   | C/T           | 0.31           | 0.32        | 0.17        |
| rs1022206              | 3q13.13  | C/T           | 0.42           | 0.40        | 0.37        |
| rs4143832              | 5q31.1   | G/T           | 0.17           | 0.21        | 0.23        |
| rs537930               | 5q31.1   | G/T           | 0.26           | 0.26        | 0.23        |
| rs1063348 <sup>a</sup> | 6p21.32  | G/A           | 0.41           | 0.41        | 0.49        |
| rs13252276             | 8p23.1   | C/T           | 0.46           | 0.43        | 0.35        |
| rs465530               | 12q14.3  | G/T           | 0.49           | 0.48        | 0.40        |
| rs8132680              | 21q22.12 | T/C           | 0.25           | 0.26        | 0.22        |

<sup>a</sup>: this polymorphism is not present in FinnGen, and therefore the frequency reported was obtained from 1000Genome.

**Supplementary table 3:** effect sizes and  $P_{\text{values}}$  reported in GWAS catalog for the SNPs selected for replication.

| SNP        | Region   | (Alleles)<br>M/m <sub>a</sub> | Trait                                                                             | OR (95CI)           | P <sub>value</sub> |
|------------|----------|-------------------------------|-----------------------------------------------------------------------------------|---------------------|--------------------|
| rs34517439 | 1p31.1   | C/A                           | Height                                                                            | 1.03 (1.02-1.04)    | 1.00E-34           |
|            |          |                               | Body mass index                                                                   | 1.04 (1.02-1.05)    | 4.00E-24           |
|            |          |                               | Fat-free mass                                                                     | 1.46 (1.28-1.65)    | 5.00E-28           |
|            |          |                               | Diastolic blood pressure                                                          | 0.79 (0.72-0.88)    | 5.00E-21           |
|            |          |                               | Hand grip strength                                                                | 0.997 (0.995-0.998) | 3.00E-12           |
|            |          |                               | Lung cancer                                                                       | 1.14 (1.09-1.18)    | 2.00E-10           |
|            |          |                               | Psoriasis                                                                         | 1.18 (NA)           | 4.00E-09           |
|            |          |                               | Smoking initiation (ever regular vs never regular) (MTAG)                         | 1.01 (1.00-1.02)    | 9.00E-09           |
|            |          |                               | Hair color                                                                        | NA                  | 2.00E-08           |
|            |          |                               | Lung adenocarcinoma                                                               | 1.17 (1.10-1.23)    | 4.00E-08           |
|            |          |                               | Lung cancer in ever smokers                                                       | 1.15 (1.09-1.21)    | 7.00E-08           |
| rs6674512  | 1p22.3   | G/A                           | Male-pattern baldness                                                             | 0.97 (0.94-0.99)    | 4.00E-10           |
| rs10187103 | 2q24.3   | C/T                           | Age of smoking initiation (MTAG)                                                  | 0.99 (0.98-1.00)    | 5.00E-09           |
| rs1022206  | 3q13.13  | C/T                           | Balding type 1                                                                    | -                   | 2.00E-12           |
| rs4143832  | 5q31.1   | G/T                           | Eosinophil counts                                                                 | -                   | 1.00E-10           |
| rs537930   | 5q31.1   | G/T                           | Height                                                                            | 0.97 (0.94-0.99)    | 9.00E-09           |
| rs1063348  | 6p21.32  | G/A                           | Childhood steroid-sensitive nephrotic syndrome                                    | 3.33 (2.62-4.23)    | 9.00E-23           |
| rs13252276 | 8p23.1   | C/T                           | General factor of neuroticism                                                     | 1.01 (1.00-1.02)    | 5.00E-09           |
| rs465530   | 12q14.3  | G/T                           | Acute graft versus host disease in bone marrow transplantation (recipient effect) | -                   | 4.00E-08           |
| rs8132680  | 21q22.12 | T/C                           | Heel bone mineral density                                                         | 0.98 (0.98-0.99)    | 3.00E-12           |

**Supplementary figure 1. Flowchart of the process performed to select the SNPs to be replicated in IMMEnSE and FinnGen**

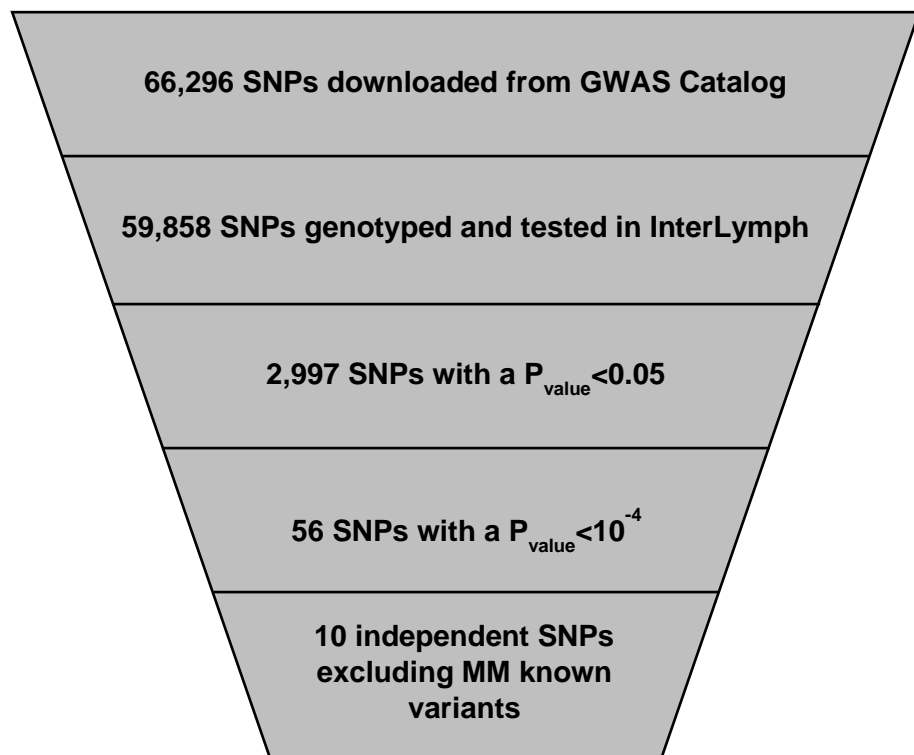

Supplement: IJC-152-239-s001.pdf [file IJC-152-239-s001.pdf]
